# Supplementary material
Source: PubMed Central journal article supplement (PMC3994860)
Supplement: amiajnl-2013-001949-s1.pdf [file amiajnl-2013-001949-s1.pdf]

## Online Appendix

### Interview and Focus Group Guide

#### *Communication and Documentation*

1. Will you please take me through a “typical” rounding scenario? You might want to think about the last rounds you participated in and pick a few patients to tell me about.
  - a. Probes: communication, documentation practices, decision-making, continuity of care.
2. How effective do you think the rounding process is at leading to positive patient outcomes?
  - a. When does rounding work well, and when does it not work well?
3. What works well to promote good communication practices among rounding participants?
  - a. Please think of a patient from today or recently. How does communication impact decision-making and continuity of care (if at all)?
4. What works well to promote quality documentation during rounds?
  - a. Please think about the same patient case. How is documentation linked to decision-making and continuity of care (if at all)?
5. What does not promote (interferes with) good communication practices?
  - a. What are the barriers to good communication and examples of poor communication?
  - b. How does this relate to decision-making and continuity of care?
6. What does not promote (interferes with) quality documentation during rounds?
  - a. How does this relate to decision-making and continuity of care?

#### *Information Needs*

7. What types of information do you typically need during rounds?
  - a. Probe: a list of specific types of clinical data elements
8. What information resources are available to you during rounds?
  - a. Probe: a list of specific resources – e.g., patient record, “in their head”, external resources such as Pubmed
9. What information resources do you refer to before rounds to prepare yourself?
  - a. What about input from other staff who will not be at rounds?
10. What types of information resources and documentation do you use during rounds to maintain decision-making and continuity of care?

#### *Decision-making and Outputs of Rounds*

11. Who maintains continuity of care in relation to the decisions made during rounds?
  - a. Probe: continuity related to planning for procedures, acute physical needs, functional capacity, transfer/discharge plans
12. How are tasks delegated and assigned?
  - a. Is there a to-do list?
  - b. What mechanisms are used to ensure that to-do items identified during rounds are completed?
  - c. How are to-dos communicated to staff that are not present at rounds?
13. In your opinion, are there things that could be done during rounds that would improve decision-making and continuity of care?

#### *Portable Devices*

14. Please think about the use of portable devices and their potential use during rounds to:
  - a. Promote effective decision-making
  - b. Facilitate continuity of care
15. Are there any devices used now?

16. What are your general thoughts about how they might be used and their potential impact?

*General Information/Suggestions*

17. If you could change one thing to improve rounds, what would it be?

18. What else would you like us to know about rounds?
